# Supplementary material
Source: PubMed Central journal article supplement (PMC3699828)
Supplement: ASN.2012080849_ASN2012080849SupplementaryData.pdf [file ASN.2012080849_ASN2012080849SupplementaryData.pdf]

**Supplemental table 1. miRs with over 2-fold change identified by Affymetrix microRNA microarray in renal biopsies from patients with lupus nephritis**

| <b>Probeset ID</b>        | <b>p-value</b> | <b>Fold-Change<br/>(high CI vs. low CI)</b> |
|---------------------------|----------------|---------------------------------------------|
| <b>Upregulated miRs</b>   |                |                                             |
| hsa-miR-150               | 0.044          | 3.89                                        |
| hsa-miR-449b              | 0.012          | 2.76                                        |
| hsa-miR-196a              | 0.010          | 2.71                                        |
| hsa-miR-516a-3p           | 0.019          | 2.23                                        |
| hsa-let-7i                | 0.026          | 2.10                                        |
| hsa-miR-520c-5p           | 0.028          | 2.03                                        |
| hsa-miR-300               | 0.030          | 2.03                                        |
| <b>Downregulated miRs</b> |                |                                             |
| mdv1-miR-M6               | 0.020          | -2.04                                       |
| hsa-miR-130a*             | 0.048          | -2.09                                       |
| hsa-miR-212               | 0.016          | -2.15                                       |
| hsa-miR-369-3p            | 0.027          | -2.21                                       |
| ebv-miR-BART18-5p         | 0.007          | -2.21                                       |
| hsa-miR-558               | 0.028          | -2.27                                       |
| hsa-miR-141*              | 0.002          | -2.45                                       |
| hsa-miR-186               | 0.034          | -2.73                                       |
| hsa-miR-122*              | 0.026          | -2.77                                       |

**Supplemental table 1.** Sixteen miRs were identified to have over 2-fold change on microarray analysis in the renal biopsies with high chronicity index (CI) compared to low CI in lupus nephritic patients.

**Supplemental table 2. Primer IDs used in Taqman RT-PCR from Applied Biosystem**

| <b>Gene Name</b>    | <b>Primer ID</b> |
|---------------------|------------------|
| miR-150             | ID 000473        |
| U48                 | ID 001006        |
| SOCS1               | Hs00705164_s1    |
| Fibronectin (FN)    | Hs00365052_m1    |
| Collagen I (COL1)   | Hs00164004_m1    |
| Collagen III (COL3) | Hs00943809_m1    |
| TGF- $\beta$ 1      | Hs00998133_m1    |
| GAPDH               | Hs99999905_m1    |

**Supplemental table 3. Antibodies used in immunostaining in renal biopsies from lupus nephritis**

| <b>Antibody name</b>                        | <b>Host</b> | <b>Dilution (ug/ml)</b> | <b>Company</b>   | <b>Catalog #</b>                     |
|---------------------------------------------|-------------|-------------------------|------------------|--------------------------------------|
| COL1                                        | Rabbit      | 10 ug/ml                | ThermoScientific | PA1-26204                            |
| SOCS1                                       | Rabbit      | 2 ug/ml                 | Abcam            | ab62584                              |
| TGF- $\beta$ 1                              | Mouse       | 5 ug/ml                 | Abcam            | ab27969                              |
| FN                                          | Mouse       | 10 ug/ml                | Santa Cruz       | sc-18825                             |
| COL3                                        | Mouse       | 10 ug/ml                | Acris            | AF5810                               |
| CD45                                        | Mouse       | 1 ug/ml                 | Dako             | M0701                                |
| Alexa-594 /488 donkey anti-rabbit/mouse IgG | Donkey      | 1:300                   | Invitrogen       | A21202<br>A21203<br>A21207<br>A21206 |

**Supplemental table 4. Three renal cell lines and optimized concentration of treatment agents**

| <b>Renal cells</b><br><b>Treatment Agents</b>                                               | <b>Primary human renal proximal tubular epithelial cells (PTCs)</b> | <b>Primary human mesangial cells (MCs)</b> | <b>Human podocyte cell line</b> |
|---------------------------------------------------------------------------------------------|---------------------------------------------------------------------|--------------------------------------------|---------------------------------|
| miR-150 analog<br>Cat #MIN0000451 (Qiagen)                                                  | 10nM                                                                | 50nM                                       | Unable transfect                |
| miR analog negative control<br>Cat#1027280 (Qiagen)                                         | 10nM                                                                | 50nM                                       | N/A                             |
| miR-150 inhibitor<br>Cat # 4464084 (Ambion)                                                 | 25nM                                                                | N/A                                        | Unable transfect                |
| <i>mirVana</i> <sup>TM</sup> miRNA Inhibitor<br>Negative Control #1<br>Cat#4464076 (Ambion) | 25nM                                                                | N/A                                        | N/A                             |
| SOCS1 siRNA<br>Cat# s16468 (Ambion)                                                         | 20nM                                                                | 50nM                                       | Unable transfect                |
| siRNA negative control #1<br>Cat# 4390843 (Ambion)                                          | 20nM                                                                | 50nM                                       | N/A                             |
| human TGF- $\beta$ 1 (hTGF- $\beta$ 1)<br>Cat# 100B (R & D)                                 | 250pg/ml                                                            | 10ng/ml                                    | 10ng/ml                         |

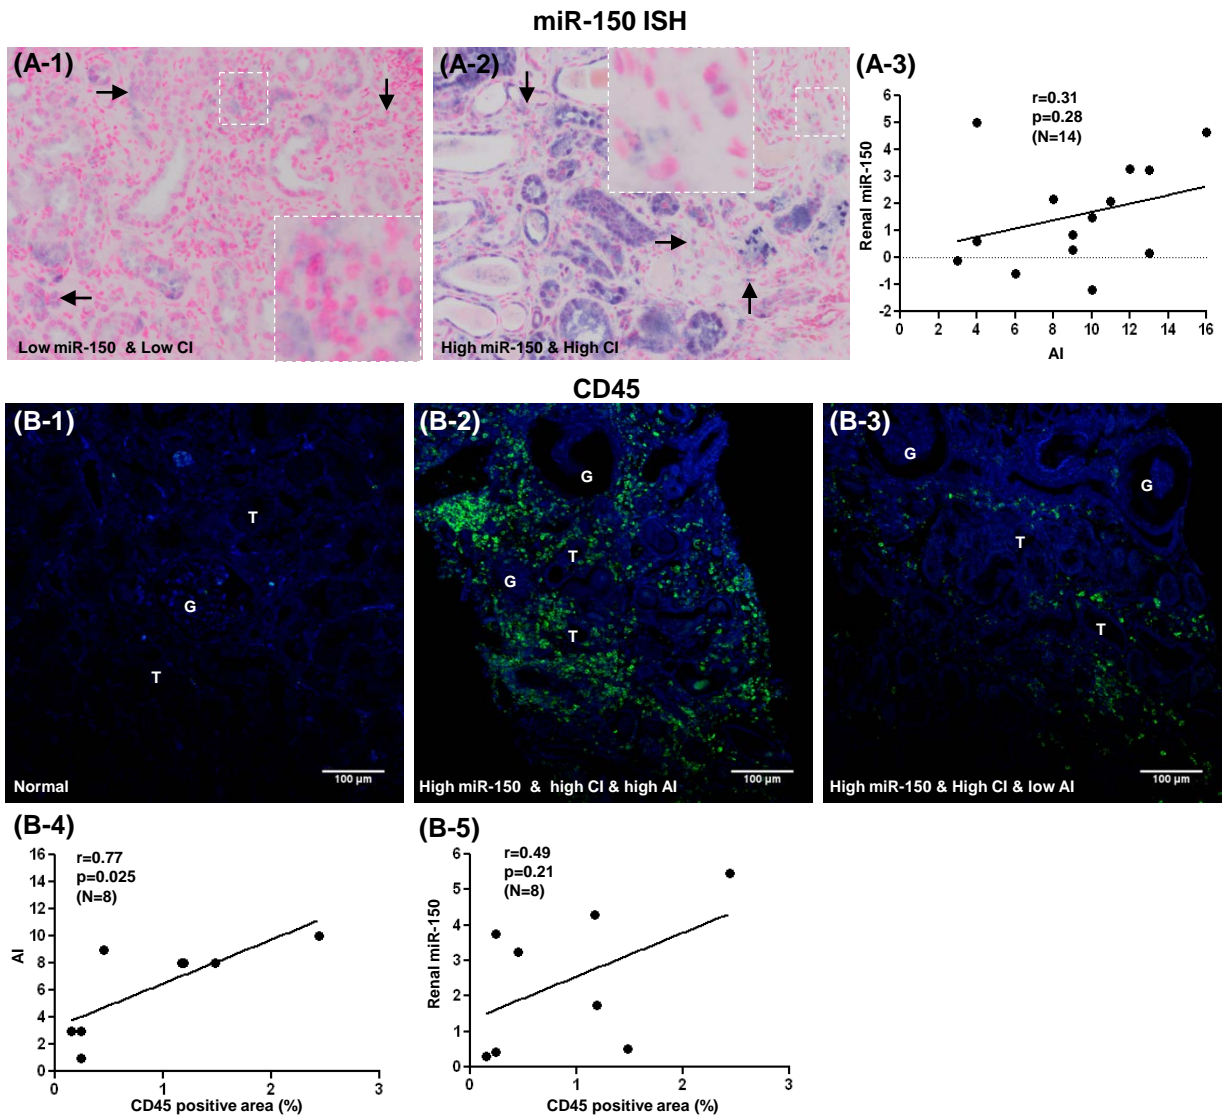

**Supplemental Figure 1. Association between total infiltrating cells and miR-150 in kidney biopsies from lupus nephritis. Faint miR-150 staining (arrow) on *in situ* hybridization (ISH) was seen in the infiltrating cells in the tubulointerstitium with no difference between the kidneys with low miR-150 and low chronicity (CI) (A-1) and the kidneys with high miR-150 and high CI (A-2) compared to the tubules with strong miR-150 positive signals (A-2). Larger insets are high magnification of the small areas. Renal miR-150 does not correlate with activity index (AI) (A-3). Immunofluorescent staining of CD45, a marker of pan-leukocytes including mononuclear and polymorphonuclear cells, in renal biopsies (B1-5). CD45+ cells were near absent in normal kidney (B-1). In kidneys with high miR-150 and CI, CD45+ cells significantly increased in the kidney with high AI (B-2) compared to the kidney with low AI (B-3). A significant positive correlation was seen between CD45+ area and AI (B-4) but not seen between CD45+ area and renal miR-150 level (B-5).**

**(A)** miR-150 in PTCs with miR-150 transfection

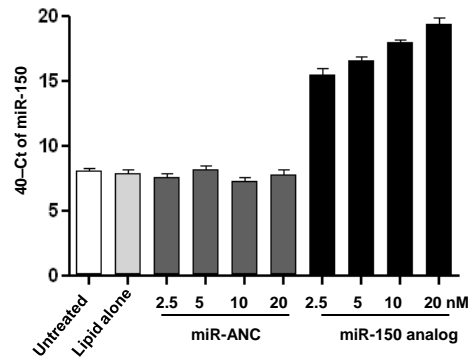

**(B)** SOCS1 in MCs with miR-150 analog transfection

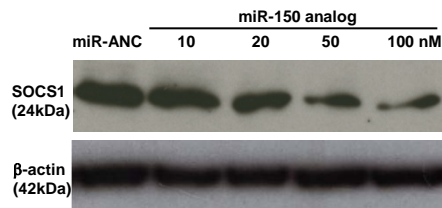

**Supplemental figure 2.** Dose optimization of miR-150 analog in primary normal human renal proximal tubular epithelial cells (PTCs) and mesangial cells (MCs). miR-150 was easily transfected into PTCs and 10nM of miR-150 could increase 10 cycles 48hr after the transfection compared to miR analog negative control (miR-ANC) (A). 50nM of miR-150 analog is needed to obtain a significant suppression of SOCS1 protein in MCs.

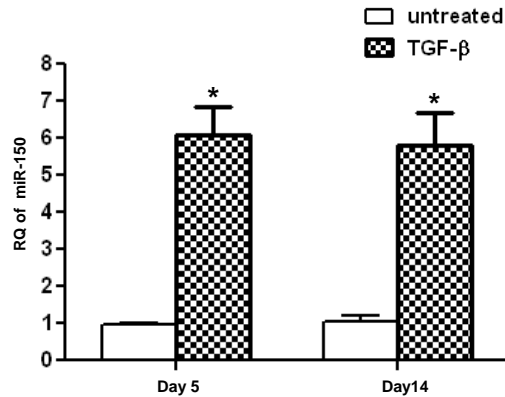

**Supplemental figure 3.** The constitutive and hTGF- $\beta$ 1- induced expression of miR-150 is the same in podocytes kept under nonpermissive culture condition (37 °C) for 5 and 14 days. There is no difference of miR-150 expressions between day 7 and day 16 in untreated podocytes or podocytes treated with hTGF- $\beta$ 1 for 48hr which induces miR-150 expression at both time points. \* $p < 0.01$  (hTGF- $\beta$ 1 vs. untreated)

### (A) Tubulointerstitium

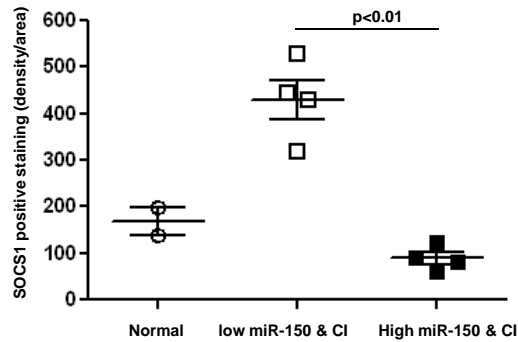

### (B) Glomeruli

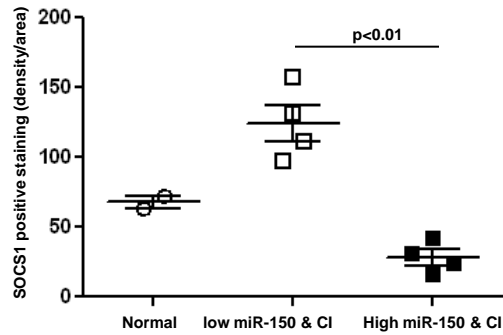

**Supplemental Figure 4.** The quantification of SOCS1 immunofluorescent staining in renal biopsies from lupus nephritis. The expression of SOCS1 increased in kidneys with low miR-150 and CI and decreased in kidneys with high miR-150 and CI compared to normal kidneys (statistical significance are not given due to two normal kidneys). SOCS1 significantly decreased in the kidneys with high miR-150 and CI compared to the kidneys with low miR-150 and CI in either tubularinterstitium (A) or glomeruli (B).
